# Supplementary material for: Ontogeny of the Digestive System of Atlantic Salmon (Salmo salar L.) and Effects of Soybean Meal from Start-Feeding
Source: PLoS One. 2015 Apr 29;10(4):e0124179. doi: 10.1371/journal.pone.0124179 (PMC4414279; doi:10.1371/journal.pone.0124179)
Supplement: S3 Table — Values are means of n = 3 pooled samples of 15 individual fish per tank, three tanks per diet. P values for the one-way ANOVA are listed for each diet separately. Different superscript letters indicate time points that are significantly different within one diet according to Tukey's multiple comparison test. (XLS) [file pone.0124179.s003.xls]

## Sheet: Table 3
Table 3	Enzyme activities and bile salt levels of juvenile Atlantic salmon from 7 to 144 days post hatch (dph).
	Trypsin (U/mg prot)	Leucine amino-peptidase (mmol/h/kg fish)	Maltase (mmol/h/kg fish)	Bile salt concentration (mg/g whole fish)
Fishmeal
p-value	<0.0001	<0.0001	<0.0001	<0.0001
7 dph	0.040b	140.5i	11.8h	0.026h
10 dph	0.040b	149.5hi	12.3h	0.027gh
13 dph	0.044b	163.9ghi	13.0h	0.032gh
17 dph	0.046b	181.7ghi	13.0h	0.039gh
20 dph	0.048b	182.7ghi	15.8h	0.049fgh
24 dph	0.059b	255.5fghi	21.2gh	0.059fgh
27 dph	0.056b	280.6efgh	22.5gh	0.079efgh
31 dph	0.060b	338.0ef	30.7efgh	0.092defgh
34 dph	0.045b	285.9efg	26.6fgh	0.072efgh
38 dph	0.047b	351.7ef	37.3efg	0.084efgh
41 dph	0.051b	366.5ef	39.1efg	0.097defg
46 dph	0.049b	409.5e	45.2ef	0.115def
49 dph	0.079ab	438.4e	51.0e	0.150cde
54 dph	0.105ab	405.1ef	49.3ef	0.176cd
60 dph	0.055b	647.5d	227.0b	0.196c
81 dph	0.052b	1115.7a	416.1a	0.288b
96 dph	0.069b	947.3b	162.4c	0.424a
144 dph	0.164a	817.1c	126.2d	0.409a
Soybean meal
p-value	0.0891	<0.0001	<0.0001	<0.0001
7 dph	0.040	140.5g	11.8e	0.026g
10 dph	0.040	149.5fg	12.3e	0.027g
13 dph	0.044	163.9fg	13.0e	0.032fg
17 dph	0.046	181.7fg	13.0e	0.039fg
20 dph	0.048	182.7fg	15.8e	0.049fg
24 dph	0.059	255.5efg	21.2e	0.059fg
27 dph	0.056	280.6def	22.5e	0.079efg
31 dph	0.060	338.0de	30.7e	0.092efg
34 dph	0.045	285.9def	26.6e	0.072efg
38 dph	0.047	351.7de	37.3e	0.084efg
41 dph	0.051	366.5de	39.1e	0.097efg
46 dph	0.049	409.5d	45.2e	0.115efg
49 dph	0.085	419.2de	49.7e	0.147def
54 dph	0.074	386.0de	51.3e	0.186cde
60 dph	0.068	625.6c	221.9b	0.213cd
81 dph	0.058	1022.9a	345.9a	0.303b
96 dph	0.062	1065.7a	154.3c	0.431a
144 dph	0.138	846.3b	120.6d	0.287bc
Values are means of n=3 pooled samples of 15 individual fish per tank, three tanks per diet. P values for the one-way ANOVA are listed for each diet separately.
Different superscript letters indicate time points that are significantly different within one diet according to Tukey's multiple comparison test.
